# Supplementary material for: Propionate Production by Bioelectrochemically-Assisted Lactate Fermentation and Simultaneous CO2 Recycling
Source: Front Microbiol. 2020 Dec 15;11:599438. doi: 10.3389/fmicb.2020.599438 (PMC7769879; doi:10.3389/fmicb.2020.599438)
Supplement: Supplementary file 8 [file Data_Sheet_3.XLSX]

## Sheet: Foglio2
Reactor	Batch	Time (d)	pH	Lactic (mM)	Acetic (mM)	Propionic (mM)	Butyric (mM)
L3	1	0	5.37	148.631	0	0	0
L3	1	0.986111	7.22	151.524	1.68959	1.19381	0
L3	1	1.27778	7.13	155.44	1.97075	1.29491	0
L3	1	2.04167	6.17	145.126	1.72979	1.51204	0
L3	1	3.02083	6.02	135.972	6.59999	6.66154	0
L3	1	4.3125	6.18	122.164	5.79956	15.1989	0
L3	1	5.06944	6.08	105.076	11.2645	23.155	0
L3	1	6.27778	6.17	98.1731	13.1596	29.9485	0
L3	1	9.38194	6.23	48.9057	23.9762	43.4562	1.73076
L3	1	10.3403	6.33	44.0702	29.3135	55.7986	1.73076
L3	1	17.3056	6.43	16.147	40.3827	63.4991	10.4915
